# Supplementary material for: Genome-Wide Association of New-Onset Hypertension According to Renin Concentration: The Korean Genome and Epidemiology Cohort Study
Source: MDPI journal article supplement (doi:10.3390/jcdd9040104), 2022-03-30
Supplement: s1 [file s1]

# Supplementary

**Table S1.** Series of SNPs for association analysis of hypertension and renin-related SNPs

| CHR | SNP              | BP          | A1        | Total hypertension new onset<br>hypertension |      |      |      | Low renin group new onset<br>hypertension |         |      |      |      | High renin group new onset hypertension |         |      |      |      |         |         |
|-----|------------------|-------------|-----------|----------------------------------------------|------|------|------|-------------------------------------------|---------|------|------|------|-----------------------------------------|---------|------|------|------|---------|---------|
|     |                  |             |           | (n= 1704) and Normotensive (n=3507)          |      |      |      | (n=1294) and Normotensive (n=2372)        |         |      |      |      | (n=410) and Normotensive (n=1135)       |         |      |      |      |         |         |
|     |                  |             |           | NMISS                                        | OR   | L95  | U95  | P                                         | NMISS   | OR   | L95  | U95  | P                                       | NMISS   | OR   | L95  | U95  | P       |         |
| 2   | rs7599476        | 186280606   | A         | 5211                                         | 1.16 | 1.06 | 1.26 | 7.2E-04                                   | 3666    | 1.26 | 1.14 | 1.39 | 6.8E-06                                 | 1545    | 0.93 | 0.79 | 1.10 | 3.9E-01 |         |
| 2   | rs10177733       | 186283241   | T         | 5211                                         | 1.16 | 1.06 | 1.26 | 7.0E-04                                   | 3666    | 1.26 | 1.14 | 1.39 | 6.8E-06                                 | 1545    | 0.93 | 0.79 | 1.10 | 4.0E-01 |         |
| 2   | rs80257808       | 201100320   | C         | 5211                                         | 1.39 | 1.16 | 1.65 | 2.8E-04                                   | 3666    | 1.67 | 1.35 | 2.06 | 2.0E-06                                 | 1545    | 0.89 | 0.63 | 1.25 | 4.9E-01 |         |
| 3   | 3:143886786:AT_A | 143886786   | D         | 5211                                         | 1.34 | 1.14 | 1.57 | 3.4E-04                                   | 3666    | 1.56 | 1.30 | 1.88 | 2.6E-06                                 | 1545    | 0.82 | 0.59 | 1.15 | 2.5E-01 |         |
| 3   |                  | rs141061779 | 162494104 | C                                            | 5211 | 0.64 | 0.52 | 0.78                                      | 1.3E-05 | 3666 | 0.58 | 0.46 | 0.73                                    | 5.2E-06 | 1545 | 0.78 | 0.53 | 1.17    | 2.3E-01 |
| 4   | rs11725871       | 4951819     | A         | 5211                                         | 1.14 | 1.05 | 1.25 | 2.8E-03                                   | 3666    | 1.04 | 0.93 | 1.15 | 5.1E-01                                 | 1545    | 1.48 | 1.25 | 1.75 | 4.4E-06 |         |
| 4   | rs11726091       | 4952412     | C         | 5211                                         | 1.14 | 1.04 | 1.24 | 3.3E-03                                   | 3666    | 1.03 | 0.93 | 1.14 | 5.5E-01                                 | 1545    | 1.48 | 1.25 | 1.75 | 4.2E-06 |         |
| 4   | rs4689189        | 4952895     | T         | 5211                                         | 1.14 | 1.04 | 1.24 | 4.3E-03                                   | 3666    | 1.03 | 0.93 | 1.14 | 5.8E-01                                 | 1545    | 1.47 | 1.24 | 1.74 | 6.3E-06 |         |
| 4   | rs2968709        | 4954275     | C         | 5211                                         | 1.14 | 1.04 | 1.24 | 4.4E-03                                   | 3666    | 1.03 | 0.93 | 1.14 | 5.8E-01                                 | 1545    | 1.47 | 1.24 | 1.74 | 6.4E-06 |         |
| 4   | rs4689191        | 4962911     | T         | 5211                                         | 1.14 | 1.05 | 1.25 | 3.0E-03                                   | 3666    | 1.04 | 0.93 | 1.15 | 5.2E-01                                 | 1545    | 1.48 | 1.25 | 1.75 | 4.4E-06 |         |
| 4   | rs17038966       | 109296214   | A         | 5211                                         | 0.72 | 0.60 | 0.86 | 2.1E-04                                   | 3666    | 0.62 | 0.50 | 0.76 | 6.0E-06                                 | 1545    | 1.05 | 0.76 | 1.44 | 7.7E-01 |         |
| 4   | rs17038968       | 109296717   | C         | 5211                                         | 0.72 | 0.60 | 0.86 | 2.1E-04                                   | 3666    | 0.62 | 0.50 | 0.76 | 6.0E-06                                 | 1545    | 1.05 | 0.76 | 1.44 | 7.7E-01 |         |
| 4   | rs740053         | 109299202   | A         | 5211                                         | 0.72 | 0.60 | 0.85 | 1.8E-04                                   | 3666    | 0.62 | 0.51 | 0.77 | 7.7E-06                                 | 1545    | 1.02 | 0.74 | 1.40 | 9.0E-01 |         |
| 4   | rs77619314       | 109299707   | A         | 5211                                         | 0.72 | 0.60 | 0.85 | 1.8E-04                                   | 3666    | 0.62 | 0.51 | 0.77 | 7.7E-06                                 | 1545    | 1.02 | 0.74 | 1.40 | 9.0E-01 |         |
| 4   | rs17551860       | 111418814   | A         | 5211                                         | 1.19 | 1.05 | 1.34 | 5.6E-03                                   | 3666    | 1.03 | 0.89 | 1.20 | 6.9E-01                                 | 1545    | 1.67 | 1.34 | 2.08 | 4.8E-06 |         |
| 4   | rs1460063        | 166804183   | G         | 5211                                         | 1.07 | 0.96 | 1.19 | 2.1E-01                                   | 3666    | 0.92 | 0.82 | 1.04 | 2.0E-01                                 | 1545    | 1.57 | 1.29 | 1.92 | 9.7E-06 |         |
| 4   | rs2125862        | 166806601   | A         | 5211                                         | 1.06 | 0.96 | 1.18 | 2.7E-01                                   | 3666    | 0.91 | 0.81 | 1.03 | 1.4E-01                                 | 1545    | 1.57 | 1.29 | 1.92 | 9.6E-06 |         |
| 4   | rs79847934       | 167190224   | A         | 5211                                         | 1.33 | 1.14 | 1.55 | 2.0E-04                                   | 3666    | 1.50 | 1.26 | 1.80 | 7.6E-06                                 | 1545    | 1.01 | 0.75 | 1.36 | 9.3E-01 |         |
| 4   | rs353077         | 167259818   | A         | 5211                                         | 1.30 | 1.12 | 1.51 | 5.0E-04                                   | 3666    | 1.51 | 1.26 | 1.80 | 5.1E-06                                 | 1545    | 0.95 | 0.71 | 1.27 | 7.1E-01 |         |
| 4   | rs9992643        | 167260185   | T         | 5211                                         | 1.30 | 1.12 | 1.51 | 6.3E-04                                   | 3666    | 1.51 | 1.27 | 1.81 | 4.9E-06                                 | 1545    | 0.93 | 0.70 | 1.25 | 6.3E-01 |         |
| 4   | rs10027143       | 167260264   | C         | 5211                                         | 1.30 | 1.12 | 1.51 | 5.2E-04                                   | 3666    | 1.52 | 1.27 | 1.81 | 4.0E-06                                 | 1545    | 0.93 | 0.70 | 1.25 | 6.3E-01 |         |
| 4   | rs73861252       | 167263637   | C         | 5211                                         | 1.30 | 1.12 | 1.51 | 5.0E-04                                   | 3666    | 1.51 | 1.27 | 1.81 | 4.7E-06                                 | 1545    | 0.94 | 0.70 | 1.26 | 6.8E-01 |         |
| 4   | rs145286444      | 167264137   | A         | 5211                                         | 1.33 | 1.15 | 1.55 | 2.1E-04                                   | 3666    | 1.54 | 1.28 | 1.84 | 2.9E-06                                 | 1545    | 0.97 | 0.72 | 1.30 | 8.2E-01 |         |
| 4   | rs73861253       | 167264848   | A         | 5211                                         | 1.30 | 1.12 | 1.51 | 5.0E-04                                   | 3666    | 1.51 | 1.27 | 1.81 | 4.7E-06                                 | 1545    | 0.94 | 0.70 | 1.26 | 6.8E-01 |         |
| 5   | rs118133352      | 62134036    | G         | 5211                                         | 2.37 | 1.70 | 3.31 | 3.9E-07                                   | 3666    | 2.64 | 1.72 | 4.03 | 7.8E-06                                 | 1545    | 2.17 | 1.26 | 3.73 | 5.4E-03 |         |
| 5   | rs1025260        | 153335137   | T         | 5211                                         | 1.24 | 1.09 | 1.42 | 1.6E-03                                   | 3666    | 1.44 | 1.23 | 1.68 | 5.5E-06                                 | 1545    | 0.81 | 0.61 | 1.06 | 1.3E-01 |         |
| 5   | rs6883500        | 153338535   | T         | 5211                                         | 1.24 | 1.09 | 1.42 | 1.6E-03                                   | 3666    | 1.44 | 1.23 | 1.68 | 5.5E-06                                 | 1545    | 0.81 | 0.61 | 1.06 | 1.3E-01 |         |
| 5   | rs2118662        | 153340134   | T         | 5211                                         | 1.24 | 1.09 | 1.42 | 1.6E-03                                   | 3666    | 1.44 | 1.23 | 1.68 | 5.5E-06                                 | 1545    | 0.81 | 0.61 | 1.06 | 1.3E-01 |         |
| 5   | rs2118663        | 153340145   | C         | 5211                                         | 1.26 | 1.10 | 1.44 | 1.0E-03                                   | 3666    | 1.46 | 1.24 | 1.71 | 3.8E-06                                 | 1545    | 0.81 | 0.61 | 1.08 | 1.5E-01 |         |
| 5   | rs72804698       | 153342954   | A         | 5211                                         | 1.24 | 1.08 | 1.41 | 1.9E-03                                   | 3666    | 1.43 | 1.22 | 1.68 | 7.3E-06                                 | 1545    | 0.81 | 0.61 | 1.06 | 1.3E-01 |         |
| 5   | rs66607728       | 153343118   | G         | 5211                                         | 1.23 | 1.08 | 1.41 | 1.9E-03                                   | 3666    | 1.43 | 1.22 | 1.67 | 6.7E-06                                 | 1545    | 0.80 | 0.61 | 1.05 | 1.1E-01 |         |
| 5   | rs7710732        | 153443533   | G         | 5211                                         | 1.25 | 1.10 | 1.41 | 6.6E-04                                   | 3666    | 1.40 | 1.21 | 1.63 | 7.4E-06                                 | 1545    | 0.88 | 0.68 | 1.13 | 3.2E-01 |         |
| 5   | rs4081999        | 153452773   | A         | 5211                                         | 1.25 | 1.10 | 1.42 | 5.2E-04                                   | 3666    | 1.41 | 1.21 | 1.63 | 6.5E-06                                 | 1545    | 0.89 | 0.69 | 1.14 | 3.5E-01 |         |
| 5   | rs34195048       | 153474851   | T         | 5211                                         | 1.24 | 1.10 | 1.41 | 7.5E-04                                   | 3666    | 1.40 | 1.21 | 1.62 | 6.9E-06                                 | 1545    | 0.87 | 0.67 | 1.12 | 2.7E-01 |         |
| 5   | 5:153475405:TG_T | 153475405   | D         | 5211                                         | 1.24 | 1.09 | 1.41 | 7.9E-04                                   | 3666    | 1.40 | 1.21 | 1.62 | 6.9E-06                                 | 1545    | 0.86 | 0.67 | 1.11 | 2.6E-01 |         |
| 5   |                  | rs4312933   | 153476659 | T                                            | 5211 | 1.24 | 1.10 | 1.41                                      | 7.1E-04 | 3666 | 1.40 | 1.21 | 1.63                                    | 6.1E-06 | 1545 | 0.86 | 0.67 | 1.11    | 2.6E-01 |
| 5   |                  | rs2882468   | 153476822 | T                                            | 5211 | 1.24 | 1.10 | 1.41                                      | 7.1E-04 | 3666 | 1.40 | 1.21 | 1.63                                    | 6.1E-06 | 1545 | 0.86 | 0.67 | 1.11    | 2.6E-01 |
| 5   |                  | rs6580052   | 153478177 | C                                            | 5211 | 1.24 | 1.10 | 1.41                                      | 6.6E-04 | 3666 | 1.40 | 1.21 | 1.63                                    | 6.1E-06 | 1545 | 0.87 | 0.67 | 1.12    | 2.7E-01 |

|   |                   |           |   |      |      |      |      |         |      |      |      |      |         |      |      |      |      |         |
|---|-------------------|-----------|---|------|------|------|------|---------|------|------|------|------|---------|------|------|------|------|---------|
| 5 | rs2434375         | 153479613 | G | 5211 | 1.24 | 1.10 | 1.41 | 7.4E-04 | 3666 | 1.40 | 1.21 | 1.63 | 6.1E-06 | 1545 | 0.86 | 0.67 | 1.11 | 2.5E-01 |
| 5 | rs815638          | 153480265 | G | 5211 | 1.24 | 1.09 | 1.40 | 8.2E-04 | 3666 | 1.40 | 1.21 | 1.62 | 7.0E-06 | 1545 | 0.86 | 0.67 | 1.11 | 2.5E-01 |
| 6 | rs12200265        | 76814691  | A | 5211 | 0.67 | 0.56 | 0.79 | 5.8E-06 | 3666 | 0.64 | 0.52 | 0.79 | 3.0E-05 | 1545 | 0.75 | 0.54 | 1.04 | 7.9E-02 |
| 6 | rs9341551         | 76821206  | A | 5211 | 0.67 | 0.56 | 0.80 | 8.8E-06 | 3666 | 0.63 | 0.50 | 0.78 | 2.3E-05 | 1545 | 0.79 | 0.57 | 1.10 | 1.6E-01 |
| 7 | 7:9855688:T_TAG   | 9855688   | I | 5211 | 0.77 | 0.64 | 0.93 | 6.1E-03 | 3666 | 0.99 | 0.80 | 1.23 | 9.6E-01 | 1545 | 0.39 | 0.26 | 0.59 | 7.7E-06 |
| 7 | rs150955441       | 23622861  | G | 5211 | 1.37 | 1.21 | 1.56 | 1.7E-06 | 3666 | 1.43 | 1.22 | 1.66 | 6.1E-06 | 1545 | 1.26 | 0.99 | 1.62 | 6.5E-02 |
| 8 | rs117963869       | 77498540  | T | 5211 | 1.18 | 1.06 | 1.31 | 2.2E-03 | 3666 | 1.05 | 0.93 | 1.19 | 4.2E-01 | 1545 | 1.55 | 1.28 | 1.87 | 8.1E-06 |
| 9 | rs10968821        | 2899925   | G | 5211 | 0.83 | 0.75 | 0.91 | 1.5E-04 | 3666 | 0.76 | 0.68 | 0.86 | 6.5E-06 | 1545 | 1.01 | 0.84 | 1.22 | 9.0E-01 |
| 9 | rs2376415         | 2904934   | C | 5211 | 0.83 | 0.75 | 0.91 | 1.1E-04 | 3666 | 0.76 | 0.67 | 0.85 | 2.2E-06 | 1545 | 1.02 | 0.85 | 1.22 | 8.3E-01 |
| 9 | rs9284028         | 16375458  | G | 5211 | 0.82 | 0.75 | 0.89 | 7.0E-06 | 3666 | 0.85 | 0.76 | 0.94 | 1.2E-03 | 1545 | 0.75 | 0.63 | 0.88 | 5.9E-04 |
| 9 | rs4327921         | 74750736  | A | 5211 | 0.80 | 0.71 | 0.90 | 1.9E-04 | 3666 | 0.72 | 0.63 | 0.83 | 7.1E-06 | 1545 | 1.04 | 0.84 | 1.30 | 7.1E-01 |
| 9 | rs4836545         | 129251213 | G | 5211 | 0.84 | 0.77 | 0.92 | 8.2E-05 | 3666 | 0.79 | 0.71 | 0.87 | 5.1E-06 | 1545 | 0.99 | 0.84 | 1.17 | 8.9E-01 |
| 9 | rs10987302        | 129253264 | G | 5211 | 0.84 | 0.77 | 0.92 | 1.2E-04 | 3666 | 0.78 | 0.70 | 0.87 | 2.8E-06 | 1545 | 1.03 | 0.87 | 1.21 | 7.6E-01 |
| 9 | 9:129253699:ATGT_ | 129253699 | D | 5211 | 0.84 | 0.77 | 0.92 | 1.2E-04 | 3666 | 0.78 | 0.70 | 0.87 | 2.6E-06 | 1545 | 1.03 | 0.87 | 1.21 | 7.6E-01 |
| 9 | rs4837266         | 131205954 | C | 5211 | 0.86 | 0.79 | 0.94 | 1.1E-03 | 3666 | 0.79 | 0.71 | 0.87 | 6.9E-06 | 1545 | 1.09 | 0.92 | 1.29 | 3.4E-01 |
| 9 | rs10987989        | 131206510 | G | 5211 | 0.86 | 0.79 | 0.94 | 1.1E-03 | 3666 | 0.79 | 0.71 | 0.87 | 7.2E-06 | 1545 | 1.09 | 0.92 | 1.29 | 3.3E-01 |
| 9 | rs55649012        | 131206797 | G | 5211 | 0.86 | 0.79 | 0.94 | 9.6E-04 | 3666 | 0.78 | 0.71 | 0.87 | 6.0E-06 | 1545 | 1.08 | 0.92 | 1.28 | 3.5E-01 |
| 9 | rs7866034         | 131209484 | T | 5211 | 0.87 | 0.79 | 0.95 | 1.8E-03 | 3666 | 0.78 | 0.70 | 0.87 | 5.3E-06 | 1545 | 1.12 | 0.95 | 1.32 | 1.9E-01 |
| 9 | rs112793868       | 131209653 | A | 5211 | 0.87 | 0.79 | 0.95 | 1.6E-03 | 3666 | 0.78 | 0.70 | 0.87 | 5.2E-06 | 1545 | 1.11 | 0.94 | 1.32 | 2.1E-01 |
| 9 | rs58657174        | 131210026 | G | 5211 | 0.87 | 0.79 | 0.95 | 1.7E-03 | 3666 | 0.78 | 0.70 | 0.87 | 5.0E-06 | 1545 | 1.12 | 0.94 | 1.32 | 2.0E-01 |
| 9 | rs12377955        | 131210080 | A | 5211 | 0.86 | 0.79 | 0.94 | 1.1E-03 | 3666 | 0.78 | 0.70 | 0.86 | 2.9E-06 | 1545 | 1.11 | 0.94 | 1.31 | 2.2E-01 |
| 9 | rs7866619         | 131210115 | T | 5211 | 0.87 | 0.79 | 0.95 | 1.7E-03 | 3666 | 0.78 | 0.70 | 0.87 | 4.9E-06 | 1545 | 1.12 | 0.94 | 1.32 | 2.0E-01 |
| 9 | rs7867073         | 131210328 | A | 5211 | 0.87 | 0.79 | 0.95 | 1.6E-03 | 3666 | 0.78 | 0.70 | 0.87 | 4.6E-06 | 1545 | 1.11 | 0.94 | 1.32 | 2.1E-01 |
| 9 | rs7869756         | 131210410 | G | 5211 | 0.87 | 0.79 | 0.95 | 1.9E-03 | 3666 | 0.79 | 0.71 | 0.87 | 7.4E-06 | 1545 | 1.11 | 0.94 | 1.31 | 2.3E-01 |
| 9 | rs7870167         | 131210643 | T | 5211 | 0.87 | 0.79 | 0.95 | 1.6E-03 | 3666 | 0.78 | 0.70 | 0.87 | 4.6E-06 | 1545 | 1.11 | 0.94 | 1.32 | 2.1E-01 |
| 9 | rs75928353        | 131210823 | G | 5211 | 0.87 | 0.79 | 0.95 | 1.6E-03 | 3666 | 0.78 | 0.70 | 0.87 | 4.6E-06 | 1545 | 1.12 | 0.94 | 1.32 | 2.0E-01 |
| 9 | rs7874255         | 131211537 | T | 5211 | 0.87 | 0.79 | 0.95 | 1.5E-03 | 3666 | 0.78 | 0.70 | 0.87 | 4.0E-06 | 1545 | 1.12 | 0.95 | 1.32 | 1.9E-01 |
| 9 | rs4836612         | 131211691 | G | 5211 | 0.86 | 0.79 | 0.94 | 1.2E-03 | 3666 | 0.78 | 0.70 | 0.87 | 4.6E-06 | 1545 | 1.10 | 0.93 | 1.30 | 2.6E-01 |
| 9 | 9:131211827:TCAG_ | 131211827 | D | 5211 | 0.86 | 0.79 | 0.94 | 1.3E-03 | 3666 | 0.78 | 0.70 | 0.87 | 4.2E-06 | 1545 | 1.11 | 0.93 | 1.31 | 2.4E-01 |
| 9 | 9:131211828:CAGG_ | 131211828 | D | 5211 | 0.87 | 0.79 | 0.95 | 1.6E-03 | 3666 | 0.78 | 0.70 | 0.87 | 4.3E-06 | 1545 | 1.12 | 0.94 | 1.32 | 2.0E-01 |
| 9 | rs10121184        | 131211934 | G | 5211 | 0.87 | 0.79 | 0.95 | 1.9E-03 | 3666 | 0.79 | 0.71 | 0.87 | 7.4E-06 | 1545 | 1.11 | 0.94 | 1.32 | 2.2E-01 |
| 9 | rs7874633         | 131211953 | G | 5211 | 0.87 | 0.79 | 0.95 | 1.5E-03 | 3666 | 0.78 | 0.70 | 0.87 | 3.7E-06 | 1545 | 1.12 | 0.95 | 1.32 | 1.9E-01 |
| 9 | rs10115137        | 131212105 | T | 5211 | 0.87 | 0.79 | 0.95 | 1.5E-03 | 3666 | 0.78 | 0.70 | 0.87 | 4.0E-06 | 1545 | 1.12 | 0.95 | 1.32 | 1.9E-01 |
| 9 | rs7849186         | 131212372 | G | 5211 | 0.86 | 0.79 | 0.94 | 9.9E-04 | 3666 | 0.78 | 0.70 | 0.87 | 3.4E-06 | 1545 | 1.10 | 0.93 | 1.30 | 2.6E-01 |
| 9 | 9:131212504:T_TTT | 131212504 | I | 5211 | 0.87 | 0.79 | 0.95 | 1.5E-03 | 3666 | 0.78 | 0.70 | 0.87 | 5.1E-06 | 1545 | 1.11 | 0.94 | 1.31 | 2.3E-01 |
| 9 | rs10117399        | 131212766 | G | 5211 | 0.87 | 0.79 | 0.95 | 1.5E-03 | 3666 | 0.78 | 0.70 | 0.87 | 3.7E-06 | 1545 | 1.12 | 0.95 | 1.32 | 1.9E-01 |
| 9 | rs7849384         | 131212831 | C | 5211 | 0.87 | 0.79 | 0.95 | 1.6E-03 | 3666 | 0.78 | 0.70 | 0.87 | 4.1E-06 | 1545 | 1.12 | 0.95 | 1.32 | 1.9E-01 |
| 9 | rs10124474        | 131213984 | T | 5211 | 0.87 | 0.79 | 0.95 | 1.5E-03 | 3666 | 0.78 | 0.70 | 0.87 | 4.0E-06 | 1545 | 1.12 | 0.95 | 1.32 | 1.9E-01 |
| 9 | rs10124529        | 131214254 | T | 5211 | 0.87 | 0.79 | 0.95 | 1.5E-03 | 3666 | 0.78 | 0.70 | 0.87 | 4.0E-06 | 1545 | 1.12 | 0.95 | 1.32 | 1.9E-01 |
| 9 | rs4240429         | 131219877 | C | 5211 | 0.86 | 0.79 | 0.94 | 9.6E-04 | 3666 | 0.78 | 0.70 | 0.87 | 3.2E-06 | 1545 | 1.10 | 0.93 | 1.30 | 2.6E-01 |
| 9 | rs10987999        | 131226457 | T | 5211 | 0.86 | 0.79 | 0.94 | 9.6E-04 | 3666 | 0.78 | 0.70 | 0.87 | 3.2E-06 | 1545 | 1.10 | 0.93 | 1.30 | 2.6E-01 |
| 9 | rs10988000        | 131228566 | A | 5211 | 0.86 | 0.79 | 0.94 | 9.6E-04 | 3666 | 0.78 | 0.70 | 0.87 | 3.2E-06 | 1545 | 1.10 | 0.93 | 1.30 | 2.6E-01 |
| 9 | rs73626757        | 131229372 | C | 5211 | 0.86 | 0.79 | 0.94 | 9.6E-04 | 3666 | 0.78 | 0.70 | 0.87 | 3.2E-06 | 1545 | 1.10 | 0.93 | 1.30 | 2.6E-01 |
| 9 | 9:131237610:CTG_C | 131237610 | D | 5211 | 0.86 | 0.79 | 0.94 | 9.0E-04 | 3666 | 0.78 | 0.70 | 0.87 | 3.3E-06 | 1545 | 1.10 | 0.93 | 1.30 | 2.8E-01 |
| 9 | rs28705141        | 131238797 | G | 5211 | 0.86 | 0.79 | 0.94 | 9.6E-04 | 3666 | 0.78 | 0.70 | 0.87 | 3.2E-06 | 1545 | 1.10 | 0.93 | 1.30 | 2.6E-01 |
| 9 | rs4837271         | 131241808 | G | 5211 | 0.86 | 0.79 | 0.94 | 9.9E-04 | 3666 | 0.78 | 0.70 | 0.86 | 3.0E-06 | 1545 | 1.10 | 0.93 | 1.30 | 2.4E-01 |
| 9 | 9:131241924:CT_C  | 131241924 | D | 5211 | 0.86 | 0.79 | 0.94 | 1.0E-03 | 3666 | 0.78 | 0.70 | 0.86 | 3.0E-06 | 1545 | 1.11 | 0.94 | 1.31 | 2.4E-01 |
| 9 | rs3924786         | 131247626 | A | 5211 | 0.86 | 0.79 | 0.94 | 9.9E-04 | 3666 | 0.78 | 0.70 | 0.86 | 3.0E-06 | 1545 | 1.10 | 0.93 | 1.30 | 2.4E-01 |

|    |                  |           |   |      |      |      |      |         |      |      |      |      |         |      |      |      |      |         |
|----|------------------|-----------|---|------|------|------|------|---------|------|------|------|------|---------|------|------|------|------|---------|
| 9  | rs4268218        | 131248122 | A | 5211 | 0.86 | 0.79 | 0.94 | 9.9E-04 | 3666 | 0.78 | 0.70 | 0.86 | 3.0E-06 | 1545 | 1.10 | 0.93 | 1.30 | 2.4E-01 |
| 9  | rs4837272        | 131248748 | G | 5211 | 0.86 | 0.79 | 0.94 | 1.1E-03 | 3666 | 0.78 | 0.70 | 0.87 | 3.2E-06 | 1545 | 1.11 | 0.94 | 1.31 | 2.4E-01 |
| 9  | rs4837273        | 131249045 | G | 5211 | 0.86 | 0.79 | 0.94 | 9.9E-04 | 3666 | 0.78 | 0.70 | 0.86 | 3.0E-06 | 1545 | 1.10 | 0.93 | 1.30 | 2.4E-01 |
| 9  | rs111396465      | 131249488 | G | 5211 | 0.86 | 0.79 | 0.94 | 8.4E-04 | 3666 | 0.78 | 0.70 | 0.87 | 3.2E-06 | 1545 | 1.09 | 0.93 | 1.29 | 2.9E-01 |
| 9  | rs7847306        | 131254439 | T | 5211 | 0.86 | 0.79 | 0.94 | 9.9E-04 | 3666 | 0.78 | 0.70 | 0.86 | 3.0E-06 | 1545 | 1.10 | 0.93 | 1.30 | 2.4E-01 |
| 9  | rs10819390       | 131256166 | T | 5211 | 0.86 | 0.79 | 0.94 | 9.9E-04 | 3666 | 0.78 | 0.70 | 0.86 | 3.0E-06 | 1545 | 1.10 | 0.93 | 1.30 | 2.4E-01 |
| 9  | rs4837274        | 131257202 | G | 5211 | 0.86 | 0.79 | 0.94 | 9.9E-04 | 3666 | 0.78 | 0.70 | 0.86 | 3.0E-06 | 1545 | 1.10 | 0.93 | 1.30 | 2.4E-01 |
| 9  | rs10988009       | 131261864 | C | 5211 | 0.86 | 0.79 | 0.94 | 1.0E-03 | 3666 | 0.78 | 0.70 | 0.86 | 3.0E-06 | 1545 | 1.11 | 0.94 | 1.31 | 2.4E-01 |
| 9  | rs28868410       | 131270256 | G | 5211 | 0.86 | 0.79 | 0.94 | 6.8E-04 | 3666 | 0.77 | 0.70 | 0.86 | 1.8E-06 | 1545 | 1.10 | 0.93 | 1.30 | 2.6E-01 |
| 9  | rs4614100        | 131270480 | T | 5211 | 0.86 | 0.79 | 0.94 | 6.8E-04 | 3666 | 0.77 | 0.70 | 0.86 | 1.8E-06 | 1545 | 1.10 | 0.93 | 1.30 | 2.6E-01 |
| 9  | rs7034108        | 131275853 | G | 5211 | 0.86 | 0.79 | 0.94 | 6.4E-04 | 3666 | 0.77 | 0.70 | 0.86 | 1.8E-06 | 1545 | 1.10 | 0.93 | 1.30 | 2.7E-01 |
| 9  | rs78557279       | 131283161 | A | 5211 | 0.86 | 0.79 | 0.94 | 6.4E-04 | 3666 | 0.77 | 0.70 | 0.86 | 1.8E-06 | 1545 | 1.10 | 0.93 | 1.30 | 2.7E-01 |
| 9  | rs13439919       | 131287118 | G | 5211 | 0.86 | 0.79 | 0.94 | 6.4E-04 | 3666 | 0.77 | 0.70 | 0.86 | 1.8E-06 | 1545 | 1.10 | 0.93 | 1.30 | 2.7E-01 |
| 9  | rs10988015       | 131287956 | T | 5211 | 0.86 | 0.79 | 0.94 | 6.4E-04 | 3666 | 0.77 | 0.70 | 0.86 | 1.8E-06 | 1545 | 1.10 | 0.93 | 1.30 | 2.7E-01 |
| 9  | rs28361547       | 131288441 | T | 5211 | 0.86 | 0.79 | 0.94 | 6.4E-04 | 3666 | 0.77 | 0.70 | 0.86 | 1.8E-06 | 1545 | 1.10 | 0.93 | 1.30 | 2.7E-01 |
| 9  | rs869455         | 131289600 | T | 5211 | 0.86 | 0.79 | 0.94 | 6.4E-04 | 3666 | 0.77 | 0.70 | 0.86 | 1.8E-06 | 1545 | 1.10 | 0.93 | 1.30 | 2.7E-01 |
| 9  | rs12339729       | 131294316 | G | 5211 | 0.86 | 0.79 | 0.94 | 6.8E-04 | 3666 | 0.77 | 0.70 | 0.86 | 1.8E-06 | 1545 | 1.10 | 0.93 | 1.30 | 2.6E-01 |
| 9  | rs10988021       | 131296580 | A | 5211 | 0.86 | 0.79 | 0.94 | 6.8E-04 | 3666 | 0.77 | 0.70 | 0.86 | 1.8E-06 | 1545 | 1.10 | 0.93 | 1.30 | 2.6E-01 |
| 9  | rs4836614        | 131301651 | C | 5211 | 0.86 | 0.79 | 0.94 | 6.5E-04 | 3666 | 0.77 | 0.70 | 0.86 | 1.7E-06 | 1545 | 1.10 | 0.93 | 1.30 | 2.6E-01 |
| 9  | rs10760563       | 131303522 | A | 5211 | 0.86 | 0.79 | 0.94 | 6.7E-04 | 3666 | 0.77 | 0.70 | 0.86 | 1.8E-06 | 1545 | 1.10 | 0.93 | 1.30 | 2.6E-01 |
| 9  | rs12336898       | 131305177 | T | 5211 | 0.85 | 0.78 | 0.93 | 4.8E-04 | 3666 | 0.77 | 0.69 | 0.86 | 1.3E-06 | 1545 | 1.09 | 0.93 | 1.29 | 2.9E-01 |
| 9  | rs10988033       | 131306479 | G | 5211 | 0.86 | 0.79 | 0.94 | 6.5E-04 | 3666 | 0.77 | 0.70 | 0.86 | 1.7E-06 | 1545 | 1.10 | 0.93 | 1.30 | 2.6E-01 |
| 9  | rs10819398       | 131309047 | A | 5211 | 0.86 | 0.79 | 0.94 | 6.5E-04 | 3666 | 0.77 | 0.70 | 0.86 | 1.7E-06 | 1545 | 1.10 | 0.93 | 1.30 | 2.6E-01 |
| 9  | rs10819399       | 131309059 | A | 5211 | 0.86 | 0.79 | 0.94 | 6.5E-04 | 3666 | 0.77 | 0.70 | 0.86 | 1.7E-06 | 1545 | 1.10 | 0.93 | 1.30 | 2.6E-01 |
| 9  | rs10819400       | 131309147 | G | 5211 | 0.86 | 0.79 | 0.94 | 6.5E-04 | 3666 | 0.77 | 0.70 | 0.86 | 1.7E-06 | 1545 | 1.10 | 0.93 | 1.30 | 2.6E-01 |
| 9  | rs12236739       | 131309995 | G | 5211 | 0.86 | 0.79 | 0.94 | 6.5E-04 | 3666 | 0.77 | 0.70 | 0.86 | 1.7E-06 | 1545 | 1.10 | 0.93 | 1.30 | 2.6E-01 |
| 9  | rs10513497       | 131311128 | C | 5211 | 0.86 | 0.79 | 0.94 | 6.5E-04 | 3666 | 0.77 | 0.70 | 0.86 | 1.7E-06 | 1545 | 1.10 | 0.93 | 1.30 | 2.6E-01 |
| 9  | rs11999274       | 131311333 | A | 5211 | 0.86 | 0.79 | 0.94 | 6.5E-04 | 3666 | 0.77 | 0.70 | 0.86 | 1.7E-06 | 1545 | 1.10 | 0.93 | 1.30 | 2.6E-01 |
| 10 | rs10870235       | 133879820 | G | 5211 | 0.80 | 0.72 | 0.89 | 2.2E-05 | 3666 | 0.76 | 0.67 | 0.85 | 7.7E-06 | 1545 | 0.91 | 0.75 | 1.11 | 3.6E-01 |
| 11 | rs1938859        | 101547723 | T | 5211 | 1.38 | 1.20 | 1.58 | 4.6E-06 | 3666 | 1.40 | 1.19 | 1.64 | 4.7E-05 | 1545 | 1.35 | 1.04 | 1.75 | 2.3E-02 |
| 11 | rs4536179        | 101555121 | T | 5211 | 1.37 | 1.20 | 1.57 | 5.9E-06 | 3666 | 1.38 | 1.18 | 1.62 | 8.2E-05 | 1545 | 1.37 | 1.06 | 1.78 | 1.8E-02 |
| 11 | rs62951762       | 101556143 | G | 5211 | 1.37 | 1.19 | 1.57 | 7.7E-06 | 3666 | 1.38 | 1.18 | 1.62 | 8.2E-05 | 1545 | 1.35 | 1.04 | 1.76 | 2.4E-02 |
| 11 | rs11224957       | 101557676 | C | 5211 | 1.37 | 1.19 | 1.57 | 6.7E-06 | 3666 | 1.38 | 1.18 | 1.62 | 8.2E-05 | 1545 | 1.36 | 1.05 | 1.77 | 2.0E-02 |
| 11 | rs12786238       | 101558792 | A | 5211 | 1.37 | 1.19 | 1.57 | 6.7E-06 | 3666 | 1.38 | 1.18 | 1.62 | 8.2E-05 | 1545 | 1.36 | 1.05 | 1.77 | 2.0E-02 |
| 11 | rs11224962       | 101562330 | A | 5211 | 1.37 | 1.20 | 1.57 | 5.0E-06 | 3666 | 1.39 | 1.19 | 1.64 | 5.1E-05 | 1545 | 1.35 | 1.04 | 1.75 | 2.3E-02 |
| 11 | rs11224968       | 101564618 | T | 5211 | 1.37 | 1.20 | 1.57 | 5.0E-06 | 3666 | 1.39 | 1.19 | 1.64 | 5.1E-05 | 1545 | 1.35 | 1.04 | 1.75 | 2.3E-02 |
| 12 | rs7964898        | 51498552  | C | 5211 | 1.99 | 1.48 | 2.67 | 4.9E-06 | 3666 | 2.02 | 1.43 | 2.86 | 7.0E-05 | 1545 | 1.83 | 1.04 | 3.23 | 3.6E-02 |
| 12 | rs2730660        | 51524025  | T | 5211 | 1.26 | 1.13 | 1.40 | 4.9E-05 | 3666 | 1.35 | 1.18 | 1.53 | 7.7E-06 | 1545 | 1.03 | 0.84 | 1.28 | 7.6E-01 |
| 12 | rs148621332      | 59405696  | C | 5211 | 1.28 | 0.91 | 1.80 | 1.6E-01 | 3666 | 0.78 | 0.51 | 1.18 | 2.4E-01 | 1545 | 4.22 | 2.24 | 7.95 | 8.9E-06 |
| 12 | 12:94188182:A_AC | 94188182  | I | 5211 | 0.74 | 0.65 | 0.84 | 4.5E-06 | 3666 | 0.75 | 0.65 | 0.88 | 2.3E-04 | 1545 | 0.69 | 0.53 | 0.89 | 4.2E-03 |
| 12 |                  | 94189185  | C | 5211 | 0.74 | 0.65 | 0.84 | 4.1E-06 | 3666 | 0.75 | 0.65 | 0.88 | 2.3E-04 | 1545 | 0.68 | 0.53 | 0.88 | 3.9E-03 |
| 12 |                  | 94189501  | G | 5211 | 0.74 | 0.65 | 0.84 | 4.1E-06 | 3666 | 0.75 | 0.65 | 0.88 | 2.3E-04 | 1545 | 0.68 | 0.53 | 0.88 | 3.9E-03 |
| 12 |                  | 94190902  | T | 5211 | 0.74 | 0.65 | 0.84 | 5.0E-06 | 3666 | 0.75 | 0.65 | 0.88 | 2.3E-04 | 1545 | 0.69 | 0.53 | 0.90 | 5.1E-03 |
| 12 |                  | 94191575  | A | 5211 | 0.74 | 0.65 | 0.84 | 4.1E-06 | 3666 | 0.75 | 0.65 | 0.88 | 2.3E-04 | 1545 | 0.68 | 0.53 | 0.88 | 3.9E-03 |
| 12 |                  | 94192225  | G | 5211 | 0.74 | 0.65 | 0.84 | 6.6E-06 | 3666 | 0.76 | 0.65 | 0.88 | 3.3E-04 | 1545 | 0.69 | 0.53 | 0.89 | 4.8E-03 |
| 12 |                  | 94192252  | G | 5211 | 0.74 | 0.65 | 0.84 | 4.1E-06 | 3666 | 0.75 | 0.65 | 0.88 | 2.3E-04 | 1545 | 0.68 | 0.53 | 0.88 | 3.9E-03 |
| 12 | rs17021583       | 94192644  | T | 5211 | 0.74 | 0.65 | 0.84 | 4.1E-06 | 3666 | 0.75 | 0.65 | 0.88 | 2.3E-04 | 1545 | 0.68 | 0.53 | 0.88 | 3.9E-03 |
| 12 | rs2131724        | 94194170  | C | 5211 | 0.74 | 0.65 | 0.84 | 5.1E-06 | 3666 | 0.76 | 0.65 | 0.88 | 2.9E-04 | 1545 | 0.68 | 0.53 | 0.88 | 3.9E-03 |

|    |                   |           |   |      |      |      |      |         |      |      |      |      |         |      |      |      |      |         |
|----|-------------------|-----------|---|------|------|------|------|---------|------|------|------|------|---------|------|------|------|------|---------|
| 12 | rs59426038        | 94200026  | A | 5211 | 0.74 | 0.65 | 0.85 | 7.6E-06 | 3666 | 0.76 | 0.65 | 0.88 | 3.1E-04 | 1545 | 0.70 | 0.54 | 0.90 | 5.9E-03 |
| 12 | rs1493856         | 94200557  | G | 5211 | 0.75 | 0.66 | 0.85 | 7.3E-06 | 3666 | 0.78 | 0.68 | 0.91 | 9.9E-04 | 1545 | 0.66 | 0.51 | 0.84 | 1.1E-03 |
| 12 | rs6538669         | 96132596  | G | 5211 | 0.81 | 0.73 | 0.90 | 1.4E-04 | 3666 | 0.74 | 0.65 | 0.84 | 5.3E-06 | 1545 | 1.02 | 0.83 | 1.25 | 8.6E-01 |
| 13 | 13:69826026:A_ATG | 69826026  | R | 5211 | 1.27 | 0.95 | 1.68 | 1.0E-01 | 3666 | 0.84 | 0.59 | 1.22 | 3.7E-01 | 1545 | 2.99 | 1.85 | 4.85 | 8.3E-06 |
| 13 | rs4545677         | 76512176  | C | 5211 | 1.26 | 1.00 | 1.58 | 4.9E-02 | 3666 | 0.92 | 0.70 | 1.21 | 5.6E-01 | 1545 | 2.70 | 1.78 | 4.11 | 3.5E-06 |
| 14 | rs10136621        | 101017490 | T | 5211 | 1.78 | 1.39 | 2.29 | 5.7E-06 | 3666 | 1.72 | 1.27 | 2.33 | 4.7E-04 | 1545 | 2.00 | 1.29 | 3.11 | 2.0E-03 |
| 18 | rs143483638       | 32800139  | T | 5211 | 1.73 | 1.36 | 2.20 | 9.0E-06 | 3666 | 1.68 | 1.26 | 2.23 | 3.4E-04 | 1545 | 1.84 | 1.15 | 2.93 | 1.1E-02 |
| 18 | rs76835068        | 32815162  | A | 5211 | 1.74 | 1.36 | 2.21 | 7.5E-06 | 3666 | 1.65 | 1.24 | 2.19 | 5.8E-04 | 1545 | 1.98 | 1.25 | 3.13 | 3.7E-03 |
| 18 | rs148088942       | 32941304  | C | 5211 | 1.69 | 1.36 | 2.10 | 2.0E-06 | 3666 | 1.56 | 1.20 | 2.01 | 7.1E-04 | 1545 | 2.06 | 1.37 | 3.10 | 5.6E-04 |
| 18 | rs117246401       | 32975483  | T | 5211 | 1.71 | 1.37 | 2.14 | 1.8E-06 | 3666 | 1.57 | 1.21 | 2.04 | 6.6E-04 | 1545 | 2.09 | 1.38 | 3.16 | 5.1E-04 |
| 22 | rs34190801        | 25212471  | R | 5211 | 0.83 | 0.76 | 0.91 | 4.7E-05 | 3666 | 0.90 | 0.81 | 1.00 | 5.8E-02 | 1545 | 0.67 | 0.56 | 0.80 | 7.3E-06 |
| 22 | rs11704456        | 25212702  | G | 5211 | 0.83 | 0.76 | 0.91 | 5.2E-05 | 3666 | 0.90 | 0.81 | 1.00 | 5.8E-02 | 1545 | 0.67 | 0.57 | 0.80 | 9.4E-06 |
| 22 | rs67278363        | 25212863  | T | 5211 | 0.83 | 0.76 | 0.91 | 5.9E-05 | 3666 | 0.90 | 0.81 | 1.01 | 6.2E-02 | 1545 | 0.67 | 0.57 | 0.80 | 9.4E-06 |
| 22 | rs16978992        | 25213023  | C | 5211 | 0.83 | 0.76 | 0.91 | 5.1E-05 | 3666 | 0.90 | 0.81 | 1.00 | 6.0E-02 | 1545 | 0.67 | 0.57 | 0.80 | 8.6E-06 |
| 22 | rs9680840         | 25213443  | C | 5211 | 0.84 | 0.77 | 0.92 | 1.2E-04 | 3666 | 0.92 | 0.82 | 1.02 | 1.0E-01 | 1545 | 0.68 | 0.57 | 0.80 | 9.1E-06 |
| 22 | rs9680841         | 25213476  | C | 5211 | 0.84 | 0.77 | 0.92 | 1.2E-04 | 3666 | 0.92 | 0.83 | 1.02 | 1.1E-01 | 1545 | 0.67 | 0.57 | 0.80 | 7.2E-06 |
| 22 | rs8137145         | 25213480  | T | 5211 | 0.83 | 0.76 | 0.91 | 6.6E-05 | 3666 | 0.91 | 0.82 | 1.01 | 7.7E-02 | 1545 | 0.67 | 0.57 | 0.80 | 6.4E-06 |
| 22 | rs11360399        | 25213669  | R | 5211 | 0.83 | 0.76 | 0.91 | 4.6E-05 | 3666 | 0.90 | 0.81 | 1.00 | 5.4E-02 | 1545 | 0.68 | 0.57 | 0.80 | 9.7E-06 |
| 22 | 22:25213674:AG_A  | 25213674  | R | 5211 | 0.83 | 0.76 | 0.91 | 5.0E-05 | 3666 | 0.90 | 0.81 | 1.00 | 5.7E-02 | 1545 | 0.68 | 0.57 | 0.80 | 9.7E-06 |
